# Supplementary material
Source: publisher figshare collection journal article supplement (https://sage.figshare.com/ndownloader/files/13585910)
Supplement: Supplementary file 1 [file 13585910]

**
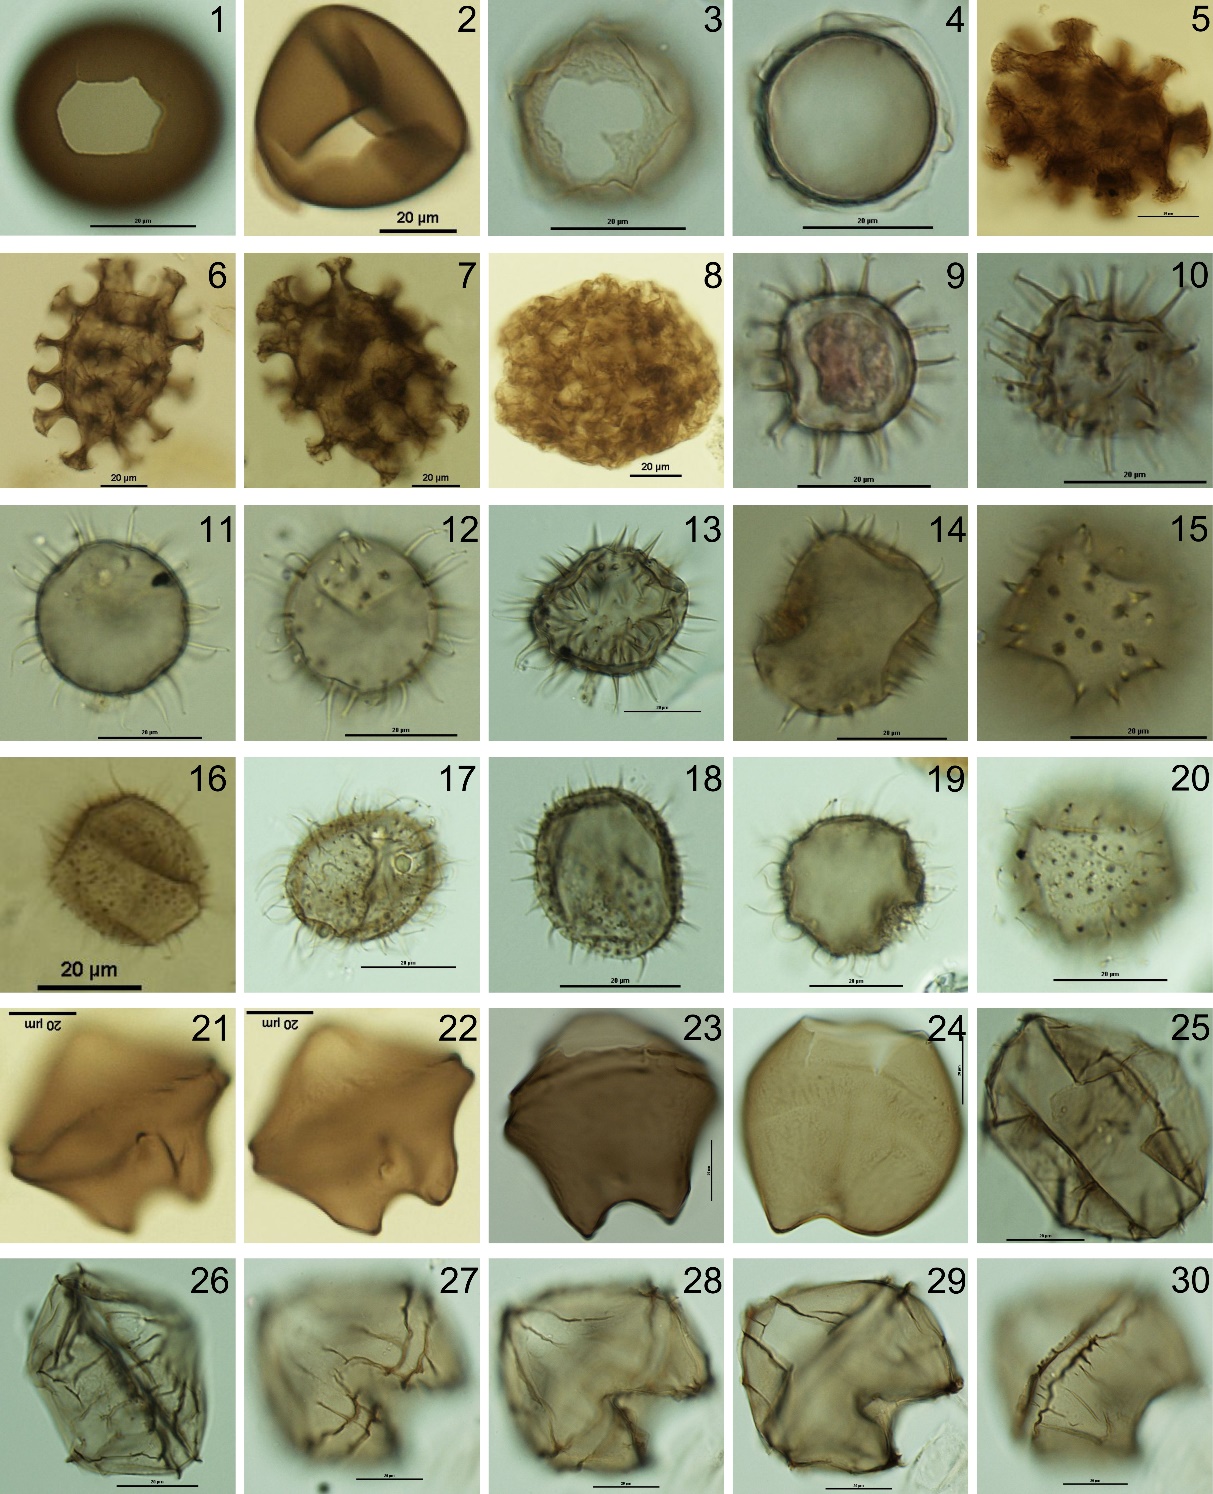
**

**Supplementary Plate 1**. Protoperidiniaceae cysts: 1-2. *Brigantedinium* spp. 3-4. Cyst of *Protoperidinium americanum*. Polykrikaceae cysts: 5-7. Cyst of *Polykrikos schwartzii*. 8. Cyst of *Polykrikos kofoidii*. Protoperidiniaceae cysts: 9-10. *Echinidinium aculeatum*. 11-13. *Echinidinium granulatum 14-15. Echinidinium transparantum*. 16-20. *Cyst of Protoperidinium* *monospinum*. 21-23. *Lejeunecysta oliva*. 24*. Lejeunecysta sabrina*. 25-30. *Lejeunecysta paratenella*. The scale bars are all 20 µm.

**
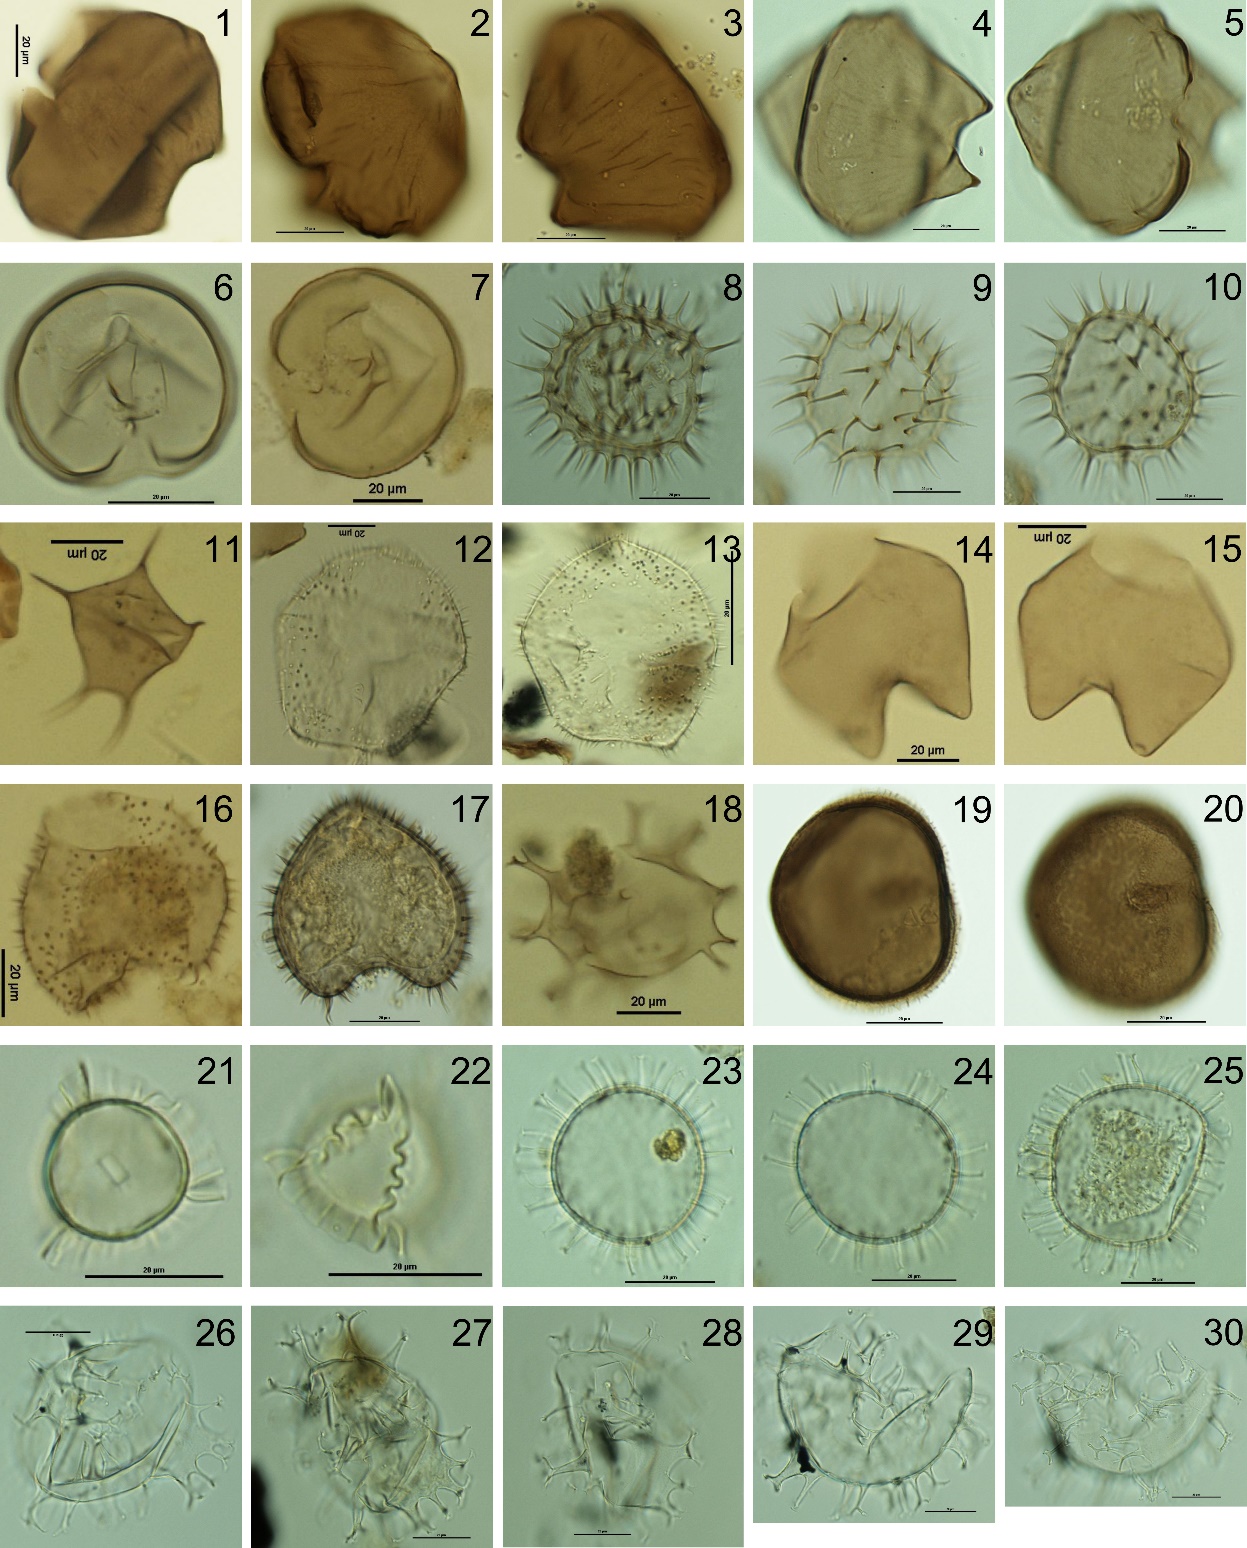
**

**Supplementary Plate 2**. Protoperidiniaceae cysts: 1-5. *Quinquecuspis concreta*. 6-7. *Selenopemphix nephroides*. 8-10. *Selenopemphix quanta*. 11. *Stelladinium robustum*. 12-13. *Trinovantedinium applanatum*. 14-15. *Votadinium calvum*. 16-17. *Votadinium spinosum*. 18. *Xandarodinium xanthum*. 19-20. *Dubridinium* spp. Gonyaulacaceae cysts: 21-22. *Impagidinium* *strialatum*. 23-25. *Operculodinium centrocarpum*. 26-28. *Spiniferites mirabilis*. 29-30. *Spiniferites hypercanthus*. The scale bars are all 20 µm.

**
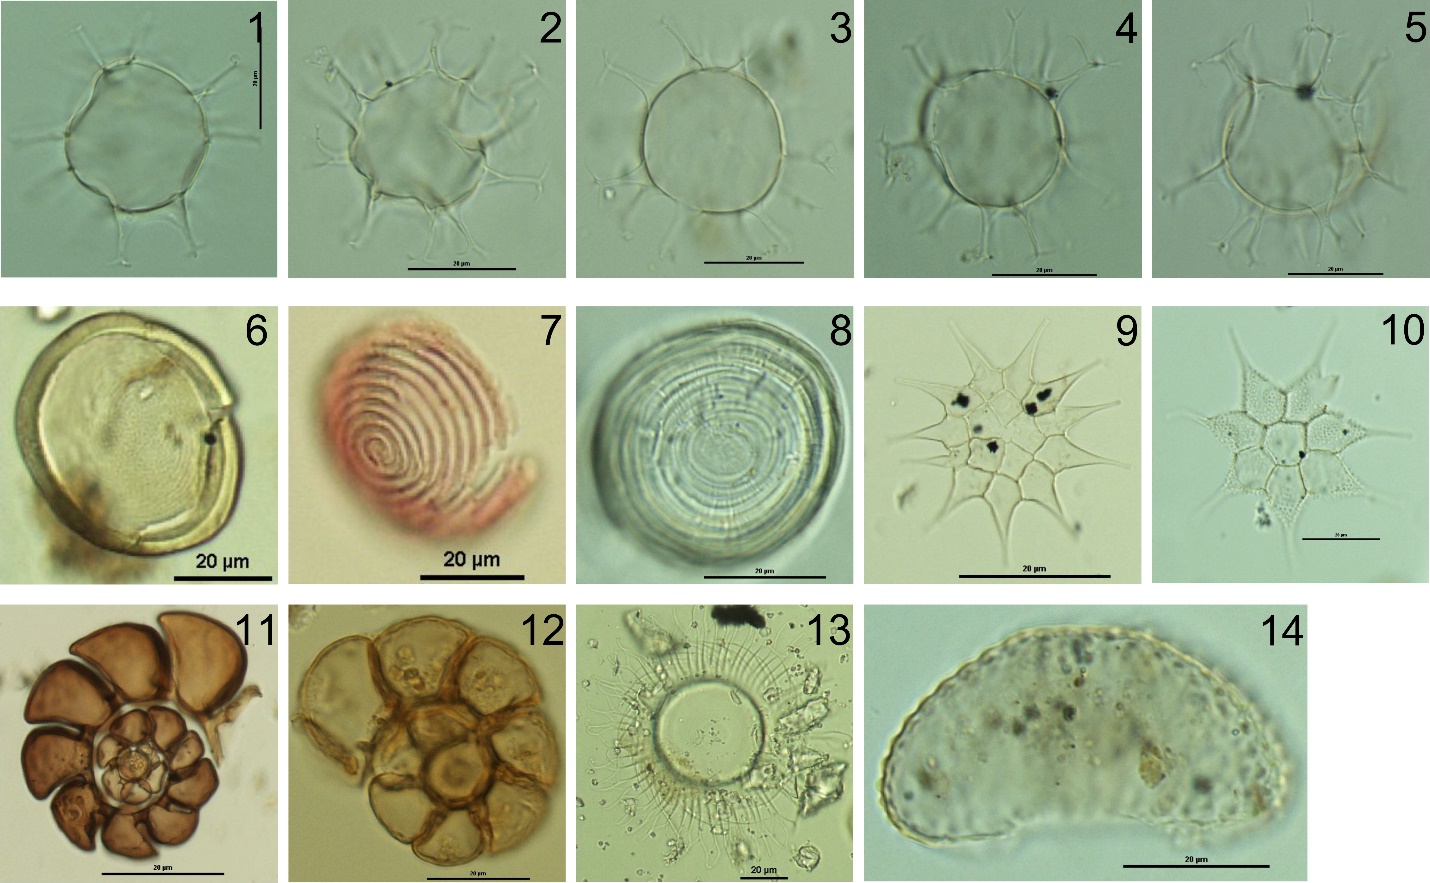
**

**Supplementary Plate 3**. Gonyaulacaceae cysts: 1-5. *Spiniferites ramosus*. 6-8. *Concentricystes*. 9-10. *Pediastrum* sp. 11-12. Foraminiferal organic linings. 13. *Radiosperma cf. R. corbiferum*. 14. *Cosmarium* spp. The scale bars are all 20 µm.
